# Supplementary material for: Trophectoderm differentiation to invasive syncytiotrophoblast is promoted by endometrial epithelial cells during human embryo implantation
Source: PubMed Central journal article supplement (PMC9398450; doi:10.1093/humrep/deac008), 2022-01-26
Supplement: deac008_supplementary_figure_s1.pdf [file deac008_supplementary_figure_s1.pdf]

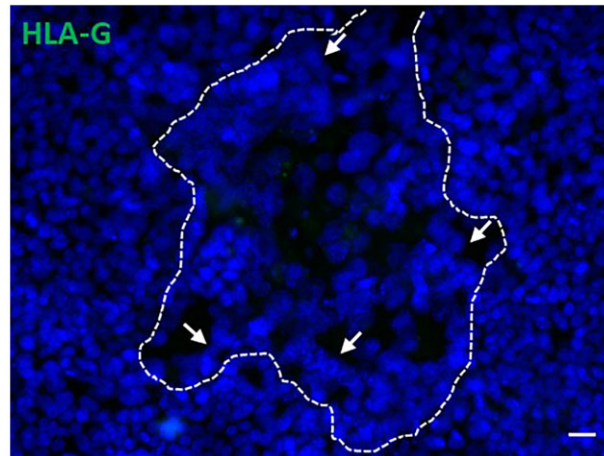

**Supplementary Figure S1. HLA-G is not expressed in embryos attached to Ishikawa endometrial epithelial cell (EEC) layers.** Fluorescence micrograph of an invasive embryo labelled with DAPI (blue) and HLA-G (green). White arrows point to regions of syncytiotrophoblast. Dotted lines indicate embryo-EEC interface. Scale bar 20  $\mu$ m. DAPI, 4',6-diamidino-2-phenylindole.
