# Supplementary material for: Trophectoderm differentiation to invasive syncytiotrophoblast is promoted by endometrial epithelial cells during human embryo implantation
Source: PubMed Central journal article supplement (PMC9398450; doi:10.1093/humrep/deac008), 2022-01-26
Supplement: deac008_supplementary_figure_s2.pdf [file deac008_supplementary_figure_s2.pdf]

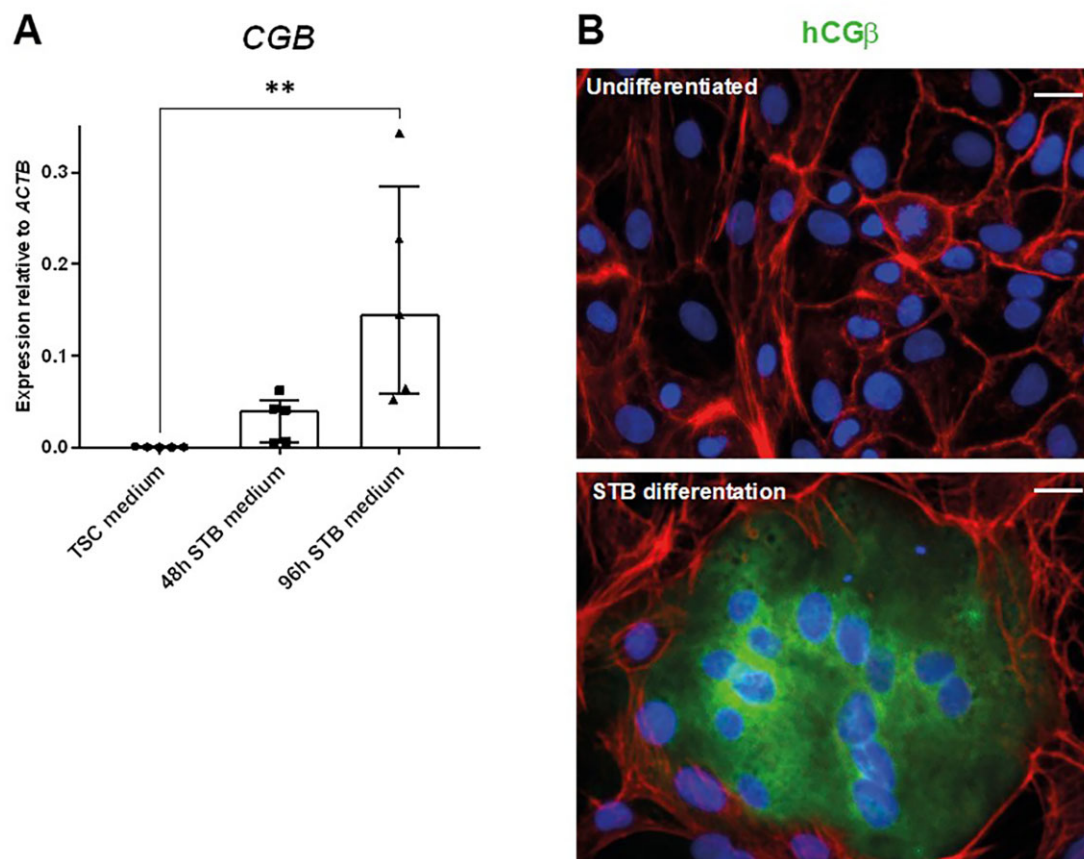

**Supplementary Figure S2. Trophoblast stem cell (TSC) can be induced to differentiate to syncytiotrophoblast (STB).**

(A) TSC were cultured in STB differentiation medium for 48 and 96 h, and were compared with TSC cultured in TSC medium. Cells were lysed for real-time quantitative PCR (RT-qPCR) and expression of STB marker *CGB* was expressed relative to *ACTB*. Five experimental repeats, median  $\pm$  IQR plotted,  $**P < 0.01$  Mann–Whitney. (B) TSC were cultured in TSC medium and in STB differentiation medium for 96 h. Cells were labelled with phalloidin (red), DAPI (blue), and anti-hCG $\beta$  (green). Scale bars 20  $\mu$ m. DAPI, 4',6-diamidino-2-phenylindole.
