# Supplementary material for: Trophectoderm differentiation to invasive syncytiotrophoblast is promoted by endometrial epithelial cells during human embryo implantation
Source: PubMed Central journal article supplement (PMC9398450; doi:10.1093/humrep/deac008), 2022-01-26
Supplement: deac008_supplementary_figure_s3.pdf [file deac008_supplementary_figure_s3.pdf]

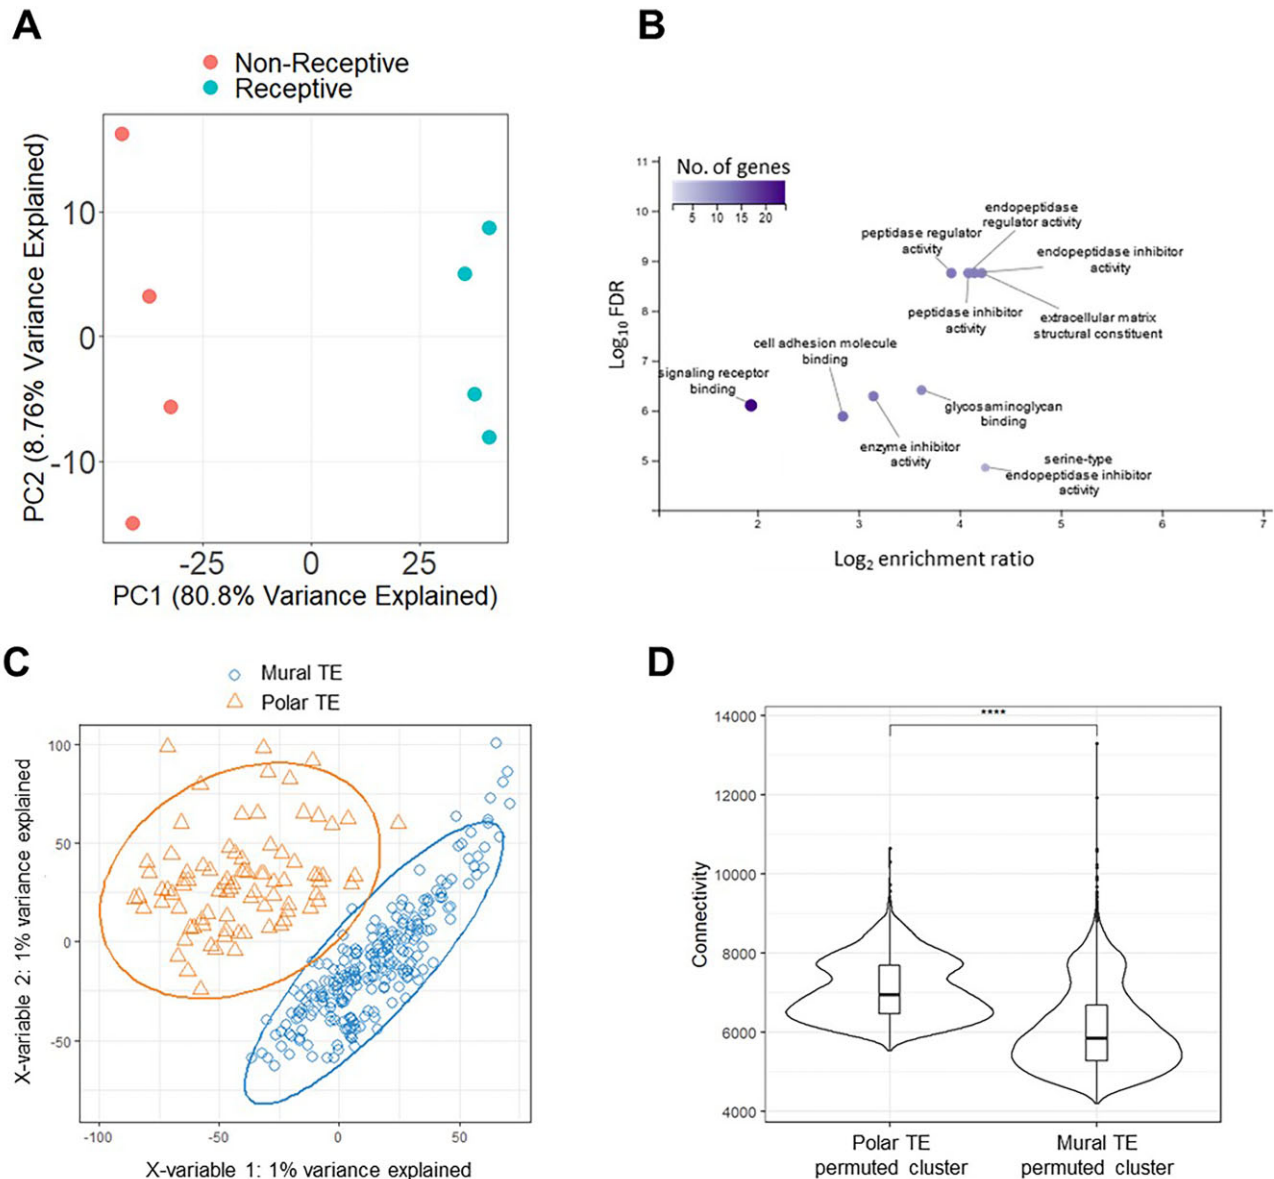

**Supplementary Figure S3. Characteristics of the *in silico* trophoblast (TE)-endometrial epithelial cell (EEC) interface. (A)** Principal component analysis (PCA) of primary EEC transcriptomes from eight patients, four proliferative phase (receptive) samples (red) and four mid-secretory-phase (non-receptive) samples (blue) (Chi *et al.*, 2020). PCA calculated on differentially regulated genes (DEGs) ( $n = 2131$ ,  $P < 0.01$  to  $8.53E-8$ ) between proliferative and mid-secretory samples. Genes that were downregulated in mid-secretory EEC were not omitted in order to prevent introducing directional bias to the gene networks identified downstream. **(B)** Molecular function gene ontologies for TE-EEC interface genes, presented as false discovery rate (FDR) relative to gene-molecular function enrichment ratio. **(C)** Partial least squares-discriminant analysis (PLS-DA) of polar and mural TE (Petropoulos *et al.*, 2016) performed on 331 whole TE transcriptomes ( $n = 142780$ ), demonstrating separation of TE into polar and mural based on a small fraction of the transcriptomes (Petropoulos *et al.*, 2016; Lv *et al.*, 2019). **(D)** Violin plots of background levels of polar and mural TE gene connectivity, as measured by permuting 1000 hypernetworks of random genes within the transcriptomes. Median line and inter-quartile range are illustrated in each box while whiskers illustrate the range, with outliers as points. \*\*\* $P < 0.001$  Wilcoxon rank sum test.
