# Supplementary material for: Trophectoderm differentiation to invasive syncytiotrophoblast is promoted by endometrial epithelial cells during human embryo implantation
Source: PubMed Central journal article supplement (PMC9398450; doi:10.1093/humrep/deac008), 2022-01-26
Supplement: deac008_supplementary_table_s1.pdf [file deac008_supplementary_table_s1.pdf]

**Supplementary Table S1** Enriched KEGG pathways (FDR < 0.05) from over-representation analysis of 3541 genes in the hypernetwork connected to EEC-interacting polar TE genes.

| Gene set | Description                               | Size | Ratio | FDR       |
|----------|-------------------------------------------|------|-------|-----------|
| hsa04740 | Olfactory transduction                    | 448  | 5.753 | <1.00E–16 |
| hsa04060 | Cytokine–cytokine receptor interaction    | 294  | 2.700 | <1.00E–16 |
| hsa04080 | Neuroactive ligand-receptor interaction   | 277  | 2.476 | 2.00E–11  |
| hsa05320 | Autoimmune thyroid disease                | 53   | 3.513 | 3.97E–05  |
| hsa04650 | Natural killer cell-mediated cytotoxicity | 131  | 2.394 | 1.17E–04  |
| hsa00040 | Pentose and glucuronate interconversions  | 34   | 4.035 | 1.27E–04  |
| hsa04620 | Toll-like receptor signalling pathway     | 104  | 2.544 | 1.56E–04  |
| hsa00140 | Steroid hormone biosynthesis              | 60   | 3.103 | 1.71E–04  |
| hsa00053 | Ascorbate and aldarate metabolism         | 27   | 4.355 | 1.73E–04  |
| hsa04630 | JAK-STAT signalling pathway               | 162  | 2.117 | 3.85E–04  |
| hsa04622 | RIG-I-like receptor signalling pathway    | 70   | 2.660 | 1.44E–03  |
| hsa04623 | Cytosolic DNA-sensing pathway             | 63   | 2.644 | 3.53E–03  |
| hsa04742 | Taste transduction                        | 83   | 2.361 | 4.74E–03  |
| hsa04657 | IL-17 signalling pathway                  | 93   | 2.213 | 8.06E–03  |
| hsa00860 | Porphyrin and chlorophyll metabolism      | 42   | 2.800 | 1.56E–02  |
| hsa05150 | <i>Staphylococcus aureus</i> infection    | 56   | 2.450 | 2.35E–02  |
| hsa04062 | Chemokine signalling pathway              | 189  | 1.711 | 2.62E–02  |
| hsa00830 | Retinol metabolism                        | 67   | 2.194 | 4.65E–02  |

FDR, false discovery rate; EEC, endometrial epithelial cell; TE, trophectoderm.
