# Supplementary material for: Trophectoderm differentiation to invasive syncytiotrophoblast is promoted by endometrial epithelial cells during human embryo implantation
Source: PubMed Central journal article supplement (PMC9398450; doi:10.1093/humrep/deac008), 2022-01-26
Supplement: deac008_supplementary_table_s2.pdf [file deac008_supplementary_table_s2.pdf]

**Supplementary Table SII** Enriched Kyoto Encyclopedia of Genes and Genomes (KEGG) pathways (false discovery rate (FDR) < 0.05) from over-representation analysis of 2447 genes in the hypernetwork connected to endometrial epithelium-interacting mural trophoblast genes.

| Gene set | Description                                  | Size | Ratio | FDR       |
|----------|----------------------------------------------|------|-------|-----------|
| hsa04740 | Olfactory transduction                       | 448  | 6.861 | <1.00E-16 |
| hsa04060 | Cytokine–cytokine receptor interaction       | 294  | 2.815 | 8.31E-11  |
| hsa00980 | Metabolism of xenobiotics by cytochrome P450 | 76   | 3.695 | 4.70E-05  |
| hsa00053 | Ascorbate and aldarate metabolism            | 27   | 6.021 | 4.79E-05  |
| hsa05320 | Autoimmune thyroid disease                   | 53   | 4.183 | 7.61E-05  |
| hsa00140 | Steroid hormone biosynthesis                 | 60   | 3.941 | 7.61E-05  |
| hsa04650 | Natural killer cell-mediated cytotoxicity    | 131  | 2.820 | 8.07E-05  |
| hsa00982 | Drug metabolism                              | 72   | 3.489 | 1.68E-04  |
| hsa05204 | Chemical carcinogenesis                      | 82   | 3.244 | 2.36E-04  |
| hsa00040 | Pentose and glucuronate interconversions     | 34   | 4.781 | 2.47E-04  |
| hsa04080 | Neuroactive ligand-receptor interaction      | 277  | 2.081 | 2.47E-04  |
| hsa04630 | JAK-STAT signalling pathway                  | 162  | 2.372 | 7.52E-04  |
| hsa00830 | Retinol metabolism                           | 67   | 3.309 | 7.52E-04  |
| hsa04622 | RIG-I-like receptor signalling pathway       | 70   | 3.167 | 1.21E-03  |
| hsa04623 | Cytosolic DNA-sensing pathway                | 63   | 3.284 | 1.31E-03  |
| hsa00860 | Porphyrin and chlorophyll metabolism         | 42   | 3.871 | 1.55E-03  |
| hsa00983 | Drug metabolism                              | 79   | 2.432 | 4.35E-02  |
