# Supplementary material for: Trophectoderm differentiation to invasive syncytiotrophoblast is promoted by endometrial epithelial cells during human embryo implantation
Source: PubMed Central journal article supplement (PMC9398450; doi:10.1093/humrep/deac008), 2022-01-26
Supplement: deac008_supplementary_table_s3.pdf [file deac008_supplementary_table_s3.pdf]

**Supplementary Table SIII** Enriched Kyoto Encyclopedia of Genes and Genomes (KEGG) pathways (false discovery rate (FDR) < 0.05) from gene set enrichment analysis (positive normalized enrichment score (NES), pathway upregulated; negative NES, pathway downregulated) of 9728 genes differentially expressed upon trophoblast stem cell (TSC) differentiation to syncytiotrophoblast (STB) ( $P < 0.01$ , TSC  $n = 4$ , STB  $n = 4$ ; [Okae et al., 2018](#)).

| Gene set | Description                             | Size | NES    | FDR       |
|----------|-----------------------------------------|------|--------|-----------|
| hsa05322 | Systemic lupus erythematosus            | 47   | 3.031  | <1.00E–04 |
| hsa05034 | Alcoholism                              | 87   | 2.150  | 3.10E–03  |
| hsa04913 | Ovarian steroidogenesis                 | 21   | 2.080  | 3.62E–03  |
| hsa04080 | Neuroactive ligand-receptor interaction | 56   | 1.941  | 1.28E–02  |
| hsa04060 | Cytokine–cytokine receptor interaction  | 79   | 1.841  | 1.99E–02  |
| hsa04630 | JAK-STAT signalling pathway             | 77   | 1.785  | 2.51E–02  |
| hsa04610 | Complement and coagulation cascades     | 28   | 1.733  | 2.99E–02  |
| hsa04978 | Mineral absorption                      | 23   | 1.720  | 2.89E–02  |
| hsa05222 | Small cell lung cancer                  | 69   | –1.677 | 4.89E–02  |
| hsa05219 | Bladder cancer                          | 31   | –1.691 | 4.57E–02  |
| hsa03460 | Fanconi anaemia pathway                 | 36   | –1.693 | 4.97E–02  |
| hsa05217 | Basal cell carcinoma                    | 39   | –1.719 | 3.93E–02  |
| hsa04310 | Wnt signalling pathway                  | 90   | –1.737 | 3.68E–02  |
| hsa04974 | Protein digestion and absorption        | 32   | –1.748 | 3.68E–02  |
| hsa04390 | Hippo signalling pathway                | 98   | –1.754 | 4.08E–02  |
| hsa03030 | DNA replication                         | 35   | –1.793 | 2.93E–02  |
| hsa04218 | Cellular senescence                     | 114  | –1.808 | 3.08E–02  |
| hsa03440 | Homologous recombination                | 31   | –1.854 | 2.08E–02  |
| hsa04110 | Cell cycle                              | 110  | –2.115 | <1.00E–04 |
